# Supplementary material
Source: HighWire-hosted journal article supplement (https://cmajopen.ca/highwire/filestream/87200/field_highwire_adjunct_files/0/2020-0306-1-at.pdf)
Supplement: 2020-0306-1-at.pdf [file 2020-0306-1-at.pdf]

## **APPENDIX 1.**

### **EMERGENCY GENERAL SURGERY IN ONTARIO**

Thank you for your participation in our study "Emergency General Surgery in Ontario" conducted by principal investigator Dr. David Gomez.

Contact: Dr. David Gomez (gomezda@smh.ca)  
REB: 19-087

This survey should take 5 minutes to complete.

Completion of this survey will have no impact on you personally or professionally. You may skip questions that you are unable, or wish not, to answer. Your information will not be collected unless you submit your survey. However, information submitted cannot be withdrawn to ensure the integrity of the study. Please feel free to keep the cover letter for your records. There will be no compensation for completion of this study.

The results of the study will be published upon study completion.

By completing this survey you are agreeing to the following: As Survey Monkey's servers are located in the United States, they are subject to the conditions of the PATRIOT ACT. As such, we cannot guarantee that these files will not be accessed by others. However, no information that personally identifies you will be collected in this survey. Consent to the study is implied by completion and submission of the survey.

1. Unique Institution Number:

#### Organizational Structure and Staffing

2. Do you have an established emergency general surgery (EGS) model of care or equivalent?

An EGS model of care is defined as an organizational structure that provides protected time for surgeons to focus on the care of patients with surgical emergencies as well as specific structures and processes designed to improve the care of patients with general surgical emergencies.

3. If yes, in what year did you establish your EGS service?

Appendix 1, as supplied by the authors. Appendix to: Skelhorne-Gross G, Nenshi R, Jerath A, et al. Structures, processes and models of care for emergency general surgery in Ontario: a cross-sectional survey. *CMAJ Open* 2021. doi:10.9778/cmajo.20200306. Copyright © 2021 The Author(s) or their employer(s). To receive this resource in an accessible format, please contact us at [cmajgroup@cmaj.ca](mailto:cmajgroup@cmaj.ca).

4. Do all general surgeons in your institutions participate in the EGS service?
5. If no, what proportion of surgeons participate in the EGS service? (<25%, 25-50%, 50-75%, >75%)
6. Do EGS surgeons typically have other clinical responsibilities (clinic, elective ORs, teaching, etc.) during the time that they are on call for EGS?
7. Does the EGS surgeon on call also cover trauma?
8. Do you have an EGS clinical associate or fellow?
9. Do residents or other surgical trainees participate in the care of EGS patients?
10. Do you have dedicated nurse practitioners or physician assistants assigned specifically to your EGS service?
11. Do you have an EGS specific outpatient clinic?

#### Operating Room Availability

12. Is the operating room available 24 hours/day at your institution?
13. Do you have dedicated operating room time which is exclusive for your EGS patients?
14. If so, please provide details on number of dedicated OR hours per day and total dedicated OR hours per week.
15. If so, what year was the dedicated OR time established?
16. Does your institution have the capability to provide emergency general surgical care to patients with an ASA score equal or greater than 3?

#### Resources

17. Does your institution have an emergency department that is open 24/7?
18. If no, what are the emergency department hours?

Appendix 1, as supplied by the authors. Appendix to: Skelhorne-Gross G, Nenshi R, Jerath A, et al. Structures, processes and models of care for emergency general surgery in Ontario: a cross-sectional survey. *CMAJ Open* 2021. doi:10.9778/cmajo.20200306. Copyright © 2021 The Author(s) or their employer(s). To receive this resource in an accessible format, please contact us at [cmajgroup@cmaj.ca](mailto:cmajgroup@cmaj.ca).

19. Does your institution have access to a CT scanner 24/7?
20. If no, when do you have access?
21. Does your institution have emergent/urgent interventional radiology capabilities?
22. If yes, what days/hours do you have access?
23. Does your institution have emergent/urgent interventional endoscopy capabilities?

Interventional endoscopy is defined as upper or lower endoscopy performed to control upper or lower gastrointestinal bleeding and/or relieve gastrointestinal obstruction.

24. If yes, during what days/hours do you have this access?
25. Does your institution have Endoscopic Retrograde Cholangio-Pancreatography (ERCP) capabilities?
26. If yes, during what days/hours do you have access?

#### Intensive Care Unit

27. Does your hospital have an intensive care unit (ICU)?
28. Does your hospital have a step-down unit?
29. Does the ICU have an outreach team to assist with management of ward emergencies?

#### Interfacility Transfer Agreements

30. Does your institution have an agreement to transfer EGS patients to other hospitals?
31. Does your institution accept EGS transfers from other hospitals?

Appendix 1, as supplied by the authors. Appendix to: Skelhorne-Gross G, Nenshi R, Jerath A, et al. Structures, processes and models of care for emergency general surgery in Ontario: a cross-sectional survey. *CMAJ Open* 2021. doi:10.9778/cmajo.20200306. Copyright © 2021 The Author(s) or their employer(s). To receive this resource in an accessible format, please contact us at [cmajgroup@cmaj.ca](mailto:cmajgroup@cmaj.ca).
